# Supplementary material for: Natural and cross-inducible anti-SIV antibodies in Mauritian cynomolgus macaques
Source: PubMed Central journal article supplement (PMC5628977; doi:10.1371/journal.pone.0186079), 2017-10-05
Supplement: pone.0186079.s001.pdf [file pone.0186079.s001.pdf]

# Figure A.

a.

```

Majority      -GPGG-RAGGFPAGQIEGGKA----
                10      20
SIVgag.pro   VGDHQ-AAMQIIRDIINEEAADWDL
PCS1.pro     -APSSGRGGNYFVQQIGGNYV
PCS2.pro     -GGPG-QKARLMAEALKEALAP
PCS3.pro     LAPVP---IPFAAAQQRGPRKPI
PCS4.pro     MAKCPDRQAGF-LGLGPWGKK
PCS5.pro     -GPWGKKPRNFPMAQVHQGLM
PCS6.pro     YGQMPRQTGGF-FRPWSMGKE
PCS7.pro     -WSMGKEAPQFPHGSSASGAD
PCS8.pro     -LQGG--DRGFAAPQFSLWRRPV
PCS9.pro     LTALG-MSLNFPIAKVEPVKV
PCS10.pro    KDPiEGEETYTDGSCNKQS
PCS11.pro    LVSQGIHQVLF-LEKIEPAQE
PCS12.pro    -NQGQYMNTPWRNPAEEREK
  
```

b.

```

Majority      -----GPL-----GQEA-N-----FPAGQVAGGKE--
                10      20      30
SIVenv1.pro  NVTESFDANNNTVTEQAIEDVWQLFETSIRPCVKLSE
PCS1.pro     -----APSS---GRGG-N-----YFVQQIGGNYV
PCS2.pro     -----GGP---GQR-R-----LMAEALKEALAP
PCS3.pro     -----LAPVP-----IP-----FAAAQQRGPRKPI
PCS4.pro     -----MAKCP---DRQA-G-----F-LGLGPWGKK
PCS5.pro     -----GPN---GKKPRN-----FPMAQVHQGLM
PCS6.pro     -----YGQMP---RQTG-G-----F-FRPWSMGKE
PCS7.pro     -----WSM---GKEAPQ-----FPHGSSASGAD
PCS8.pro     -----LQ---GGDR-G-----FAAPQFSLWRRPV
PCS9.pro     -----LTAL---GMSL-N-----FPIAKVEPVKV
PCS10.pro    -----KDPiE---GET-Y-----YTDGSCNKQS
PCS11.pro    -----LVSQ---GIHQ-V-----LFLEKIEPAQE
PCS12.pro    -----NQ---GQYM-N-----TPWRNPAEEREK
  
```

c.

```

Majority      ---AQGPR---NFPFAGAAQEGLE-----
                10      20      30
SIVenv2.pro  RVTIAIEKYLKDQAQLNAWGCAFRQVCHTTPWPNA
PCS1.pro     ---APSSG---RGGNYFVQQIGGNYV
PCS2.pro     ---GGPGQK---ARLMAEALKEALAP
PCS3.pro     ---LAPVP-----IPFAAAQQRGPRKPI
PCS4.pro     ---MAKCPD---RQAGFGLGPWGKK
PCS5.pro     GPWGKKPR---NFPMAQVHQ-GLM
PCS6.pro     ---YGQMPR---QTGGFFRPWSMGKE
PCS7.pro     ---WSMGKE-APQFPHGSSASGAD
PCS8.pro     ---LQGGD---RGFAAPQFSLWRRPV
PCS9.pro     -LTALGMS--LNFPIAKVEPVKV
PCS10.pro    ---KDPiEGEETYTDGSCNKQS
PCS11.pro    -LVSQGIHQVLF-LEKIEPAQE
PCS12.pro    ---NQGQY-M-NTPWRNPAEEREK
  
```

**Figure A. Non-PCS peptides have no sequence homology with PCS peptides.** The sequences of PCS peptides were aligned against that of non-PCS peptide SIVgag (a), SIVenv1 (b) or SIVenv2 (c) by Clustal W method. Alignment reports are shown, with amino acids that match those of non-PCS peptides decorated in black shades.

**Figure B.**

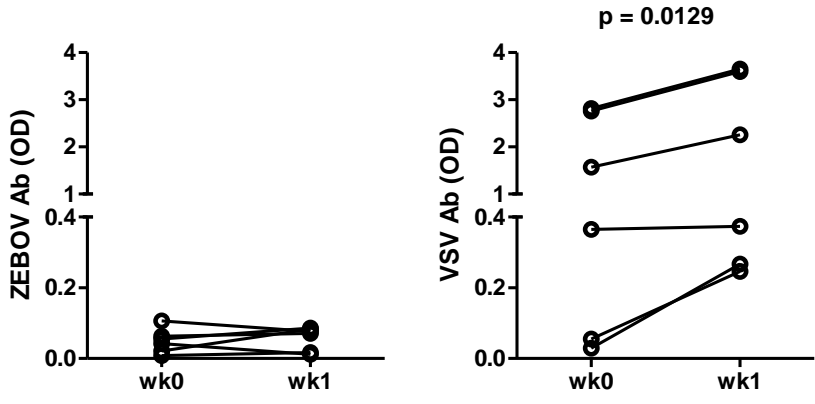

**Figure B. rVSVwt induced anti-VSV antibodies in control monkeys of the PCS vaccination experiments.** The six control monkeys of the PCS vaccination experiments (i.e. monkeys from Fig 6B), who received vaccine vehicles, rVSVwt and water, were quantified by ELISA for levels of plasma IgG to Zaire Ebola virus (ZEBOV) and vesicular stomatitis virus (VSV) at time points of weeks 0 and 1 after the second boost. OD, optical density. rVSVwt significantly boosted antibodies to VSV but not ZEBOV as confirmed by Student's paired *t* test.

**Table A.** Information list of 108 female Mauritian Cynomolgus macaques for screening of natural antibodies to SIV antigens.

| No. | ID     | Source      | MHC haplotypes  |              | Antibody (ng/ml) |      |       |       |       |       |       |      |      |       |        |       |        |         |         |  |
|-----|--------|-------------|-----------------|--------------|------------------|------|-------|-------|-------|-------|-------|------|------|-------|--------|-------|--------|---------|---------|--|
|     |        |             | Class I         | Class II     | PCS1             | PCS2 | PCS3  | PCS4  | PCS5  | PCS6  | PCS7  | PCS8 | PCS9 | PCS10 | PCS11  | PCS12 | SIVgag | SIVenv1 | SIVenv2 |  |
| 1   | AB484J | Colony bred | M3/M6           | M4/M1        | 3.08             | 5.15 | 3.78  | 4.65  | 3.14  | 2.96  | 4.50  | 2.95 | 3.89 | 3.23  | 56.10  | 3.38  | 3.63   | 4.34    | 3.02    |  |
| 2   | AB841J | Colony bred | M4/recM4M1      | M3/M6        | 4.24             | 7.68 | 4.28  | 4.54  | 5.38  | 6.58  | 8.53  | 4.74 | 5.06 | 3.14  | 40.76  | 6.15  | 5.69   | 12.59   | 5.24    |  |
| 3   | AC177I | Colony bred | M1/M3           | M1/M3        | 0.95             | 1.03 | 0.79  | 1.46  | 1.10  | 0.89  | 0.92  | 1.14 | 0.93 | 0.64  | 0.89   | 1.17  | 1.11   | 1.61    | 1.33    |  |
| 4   | AD241H | Colony bred | M1/M4           | M1/M4        | 0.74             | 0.62 | 2.21  | 1.08  | 0.77  | 0.58  | 0.36  | 0.76 | 0.42 | 0.19  | 0.44   | 0.40  | 0.53   | 0.55    | 1.07    |  |
| 5   | AE205I | Colony bred | M3/M3           | M3/M3        | 0.41             | 0.57 | 0.76  | 2.88  | 1.01  | 0.89  | 6.62  | 0.62 | 0.93 | 0.49  | 1.45   | 0.49  | 0.40   | 0.70    | 1.45    |  |
| 6   | AE916H | Colony bred | M1/M3           | M1/M3        | 3.82             | 4.45 | 5.56  | 5.27  | 4.44  | 2.64  | 3.70  | 3.02 | 4.10 | 5.35  | 3.07   | 3.78  | 2.95   | 5.97    | 3.23    |  |
| 7   | AE969H | Colony bred | M1/M1           | M1/M1        | 3.14             | 1.33 | 1.24  | 5.67  | 2.28  | 1.97  | 1.41  | 1.94 | 0.93 | 0.55  | 1.93   | 0.96  | 3.30   | 1.42    | 3.26    |  |
| 8   | AF203G | Colony bred | M1/M6           | M1/M6        | 1.57             | 1.03 | 1.54  | 1.02  | 0.86  | 0.92  | 0.93  | 1.32 | 0.99 | 1.20  | 0.80   | 1.23  | 1.14   | 0.86    | 1.16    |  |
| 9   | AF527H | Colony bred | M1/M4           | M1/M4        | 0.55             | 0.59 | 0.58  | 8.85  | 13.82 | 0.65  | 1.38  | 0.79 | 0.36 | 0.28  | 0.43   | 0.56  | 0.37   | 1.24    | 8.10    |  |
| 10  | AF855F | Colony bred | recM2M3/M6      | M3/M2        | 1.51             | 3.05 | 1.53  | 1.25  | 1.42  | 3.61  | 1.20  | 2.06 | 1.18 | 0.93  | 4.59   | 2.06  | 2.07   | 3.51    | 1.72    |  |
| 11  | AH695F | Colony bred | M3/M3           | M3/M3        | 1.16             | 1.59 | 1.08  | 1.31  | 1.21  | 2.04  | 0.89  | 1.51 | 1.42 | 0.90  | 2.62   | 1.17  | 1.38   | 1.94    | 1.42    |  |
| 12  | AJ753E | Colony bred | M1/M3           | M1/M3        | 1.87             | 3.28 | 4.16  | 4.42  | 32.84 | 1.90  | 2.07  | 1.59 | 2.66 | 3.14  | 7.91   | 6.98  | 1.35   | 3.08    | 2.76    |  |
| 13  | AL397D | Colony bred | M1/recM4M5      | M2/M5        | 0.55             | 0.63 | 0.70  | 3.25  | 0.95  | 0.73  | 0.50  | 1.32 | 0.66 | 0.43  | 0.44   | 0.61  | 0.65   | 1.07    | 13.27   |  |
| 14  | AL554E | Colony bred | M5/recM2M1      | M5/M2        | 1.33             | 3.24 | 2.24  | 5.42  | 2.37  | 3.30  | 1.48  | 2.80 | 1.49 | 1.41  | 3.30   | 1.85  | 2.36   | 3.32    | 136.33  |  |
| 15  | AL66B  | Colony bred | M2/recM2M4      | M2/M4        | 3.91             | 3.30 | 3.33  | 1.19  | 1.63  | 4.55  | 2.53  | 3.16 | 2.48 | 3.63  | 4.92   | 4.25  | 4.04   | 9.61    | 1.94    |  |
| 16  | AL793C | Colony bred | M1/M1           | M1/M1        | 1.27             | 2.13 | 1.23  | 2.10  | 1.01  | 1.39  | 0.74  | 2.28 | 0.96 | 0.81  | 1.13   | 1.38  | 1.38   | 2.83    | 1.14    |  |
| 17  | AL850A | Colony bred | M1/M6           | M1/M6        | 0.68             | 1.21 | 0.87  | 3.46  | 1.24  | 0.95  | 1.23  | 1.17 | 0.68 | 0.52  | 0.74   | 0.84  | 1.44   | 3.39    | 2.95    |  |
| 18  | AN190C | Colony bred | M1/M4           | M1/M4        | 1.60             | 0.54 | 0.84  | 1.61  | 0.96  | 1.01  | 0.59  | 0.84 | 0.50 | 0.43  | 1.70   | 0.70  | 0.64   | 0.93    | 1.24    |  |
| 19  | AP101B | Colony bred | M3/M6           | M3/M6        | 1.23             | 1.03 | 1.01  | 5.74  | 1.16  | 1.85  | 0.83  | 1.11 | 0.90 | 0.79  | 105.01 | 0.93  | 0.79   | 1.23    | 1.24    |  |
| 20  | AP159A | Colony bred | M7/M1           | M7/M3        | 2.58             | 0.73 | 0.84  | 1.11  | 2.19  | 1.05  | 0.50  | 0.96 | 0.63 | 0.67  | 66.25  | 14.12 | 0.70   | 0.84    | 1.07    |  |
| 21  | AP215A | Colony bred | M3/M6           | M2/recM6M4M7 | 0.59             | 0.79 | 1.11  | 1.12  | 0.95  | 0.98  | 0.67  | 0.92 | 0.69 | 0.73  | 0.89   | 0.79  | 1.07   | 1.48    | 1.01    |  |
| 22  | AP489B | Colony bred | M3/recM4M1      | M3/M1        | 1.84             | 0.47 | 0.40  | 0.60  | 0.53  | 0.41  | 0.33  | 0.55 | 0.25 | 0.31  | 0.33   | 0.31  | 0.36   | 0.55    | 0.50    |  |
| 23  | AR939A | Colony bred | M4/M7           | M4/M7        | 2.62             | 0.44 | 0.61  | 1.25  | 0.98  | 0.53  | 1.07  | 0.73 | 0.41 | 0.25  | 0.41   | 0.49  | 0.34   | 0.58    | 0.96    |  |
| 24  | BF440D | Colony bred | M6/recM3M2      | M6/M2        | 0.96             | 1.33 | 1.36  | 1.49  | 1.93  | 1.10  | 9.51  | 1.14 | 1.05 | 0.79  | 1.13   | 9.82  | 0.76   | 1.88    | 1.60    |  |
| 25  | BF282E | Colony bred | M3/M4           | M3/M4        | 2.10             | 1.16 | 1.53  | 1.16  | 1.72  | 0.89  | 0.95  | 1.26 | 1.25 | 1.02  | 1.19   | 1.08  | 1.85   | 4.81    | 1.66    |  |
| 26  | BF289D | Colony bred | M4/recM3M1      | M4/M1        | 0.64             | 0.44 | 0.40  | 1.73  | 1.01  | 0.55  | 0.44  | 0.55 | 0.36 | 0.25  | 0.36   | 0.43  | 0.49   | 0.73    | 14.50   |  |
| 27  | BF420E | Colony bred | M1/M3           | M1/M3        | 1.21             | 3.08 | 1.97  | 3.83  | 2.22  | 1.84  | 1.13  | 1.73 | 2.01 | 0.93  | 1.93   | 1.50  | 1.21   | 1.79    | 2.93    |  |
| 28  | BF472D | Colony bred | M3/recM4M2      | M3/M2        | 18.98            | 0.55 | 0.55  | 1.11  | 1.04  | 0.68  | 0.41  | 0.70 | 0.45 | 0.36  | 1.05   | 0.55  | 0.40   | 0.93    | 1.24    |  |
| 29  | BF513E | Colony bred | M2/M4           | M2/M4        | 0.59             | 0.76 | 0.93  | 1.25  | 1.10  | 0.68  | 0.58  | 1.08 | 0.66 | 0.67  | 80.71  | 0.68  | 1.50   | 1.02    | 1.13    |  |
| 30  | BF519F | Colony bred | M2/recM3M2      | M2/M2        | 1.30             | 0.65 | 0.70  | 1.36  | 1.19  | 1.36  | 0.53  | 0.90 | 0.47 | 0.39  | 1.24   | 0.67  | 0.95   | 0.84    | 7.94    |  |
| 31  | BF601C | Colony bred | M1/M6           | M1/M6        | 0.84             | 0.41 | 0.46  | 1.05  | 0.68  | 0.52  | 0.36  | 0.67 | 0.28 | 0.22  | 0.39   | 0.40  | 0.34   | 4.76    | 0.67    |  |
| 32  | BF615C | Colony bred | M1/M4           | M1/M4        | 1.96             | 2.91 | 1.79  | 1.99  | 1.39  | 6.22  | 3.47  | 2.30 | 2.10 | 2.00  | 16.04  | 2.43  | 3.01   | 3.99    | 1.90    |  |
| 33  | BF651B | Colony bred | M2/recM1M3      | M2/M3        | 2.93             | 2.48 | 3.72  | 1.65  | 1.76  | 1.90  | 2.33  | 2.67 | 2.56 | 2.77  | 1.90   | 2.77  | 2.56   | 3.33    | 1.69    |  |
| 34  | BF656B | Colony bred | M6/M4           | M6/M1        | 1.45             | 0.73 | 0.90  | 3.24  | 1.69  | 1.21  | 0.53  | 1.85 | 0.57 | 0.44  | 238.55 | 0.76  | 0.73   | 0.90    | 12.52   |  |
| 35  | BF664C | Colony bred | M3/M4           | M3/M4        | 1.35             | 1.55 | 2.40  | 1.93  | 21.13 | 1.19  | 1.29  | 1.38 | 1.42 | 1.97  | 0.83   | 1.20  | 0.84   | 3.19    | 2.64    |  |
| 36  | BF690D | Colony bred | M1/M2           | M1/M2        | 2.50             | 0.84 | 0.64  | 1.96  | 0.98  | 0.77  | 1.16  | 0.80 | 0.57 | 0.50  | 0.73   | 0.80  | 0.74   | 1.79    | 5.30    |  |
| 37  | BF757C | Colony bred | M3/M6           | M2/M6        | 1.45             | 1.65 | 2.09  | 2.66  | 7.60  | 26.34 | 1.72  | 1.64 | 1.34 | 1.61  | 0.98   | 1.56  | 1.20   | 2.15    | 7.27    |  |
| 38  | BF919C | Colony bred | M3/M3           | M3/M3        | 0.93             | 0.81 | 0.96  | 2.91  | 1.13  | 0.74  | 0.70  | 0.92 | 0.97 | 0.64  | 0.71   | 0.81  | 0.76   | 1.24    | 2.31    |  |
| 39  | BF996A | Colony bred | recM1M2/recM4M5 | M2/M5        | 6.49             | 8.87 | 10.83 | 12.45 | 5.81  | 3.73  | 6.90  | 5.08 | 6.94 | 13.13 | 4.59   | 7.05  | 5.17   | 7.57    | 3.93    |  |
| 40  | BF9F   | Colony bred | M2/M3           | M2/M3        | 0.95             | 0.82 | 0.83  | 0.84  | 0.71  | 1.30  | 0.53  | 0.93 | 0.79 | 0.76  | 1.39   | 0.96  | 0.81   | 1.07    | 1.14    |  |
| 41  | BM52B  | Colony bred | M1/recM4M3      | M1/M3        | 1.69             | 1.46 | 1.79  | 2.94  | 1.66  | 1.93  | 1.16  | 2.15 | 1.28 | 0.96  | 1.72   | 52.03 | 1.82   | 1.87    | 2.13    |  |
| 42  | BM654B | Colony bred | M1/M3           | M1/M1        | 0.92             | 2.17 | 0.96  | 3.21  | 2.03  | 1.07  | 0.92  | 1.17 | 0.93 | 0.79  | 0.86   | 0.90  | 1.05   | 2.89    | 2.49    |  |
| 43  | JR2E   | Colony bred | M2/M5           | M2/M5        | 0.59             | 5.34 | 0.64  | 2.10  | 0.74  | 0.80  | 2.00  | 0.73 | 0.45 | 0.28  | 1.56   | 0.64  | 2.95   | 0.67    | 1.66    |  |
| 44  | M62J   | Colony bred | M1/recM3M2      | M1/M2        | 2.07             | 0.53 | 0.64  | 0.99  | 1.04  | 0.79  | 0.86  | 0.74 | 0.60 | 0.64  | 13.69  | 0.64  | 0.58   | 1.05    | 1.48    |  |
| 45  | N917K  | Colony bred | M4/M7           | M4/M7        | 1.33             | 1.39 | 1.88  | 2.23  | 2.99  | 1.87  | 1.79  | 1.53 | 1.76 | 1.36  | 2.28   | 1.39  | 1.20   | 1.69    | 2.64    |  |
| 46  | AM466B | Colony bred | M2/M3           | M2/M3        | 2.04             | 2.84 | 2.16  | 1.88  | 2.28  | 1.41  | 2.64  | 1.96 | 2.56 | 1.26  | 1.72   | 2.30  | 1.85   | 4.62    | 3.05    |  |
| 47  | BF843A | Colony bred | M1/M1           | M1/M1        | 0.56             | 0.76 | 0.64  | 1.77  | 0.89  | 5.60  | 0.59  | 0.84 | 0.94 | 0.52  | 7.70   | 0.81  | 0.84   | 1.64    | 3.48    |  |
| 48  | 270G1  | Colony bred | recM3M1/recM4M1 | M1/M1        | 0.89             | 1.46 | 1.69  | 2.38  | 1.99  | 1.24  | 1.67  | 1.51 | 2.14 | 1.13  | 0.87   | 1.02  | 0.90   | 1.51    | 4.95    |  |
| 49  | AA687K | Colony bred | M4/recM5M1      | M4/M4        | 0.47             | 0.71 | 0.65  | 2.36  | 0.92  | 1.04  | 10.00 | 0.96 | 0.45 | 0.30  | 0.61   | 0.61  | 0.53   | 4.83    | 1.53    |  |
| 50  | AE938G | Colony bred | M2/M5           | M2/M5        | 0.62             | 5.43 | 1.04  | 1.83  | 1.27  | 1.21  | 0.76  | 1.30 | 0.72 | 0.49  | 1.79   | 0.79  | 0.90   | 1.69    | 1.30    |  |
| 51  | AF391K | Colony bred | M2/recM2M5      | M1/M5        | 0.33             | 0.39 | 0.53  | 0.91  | 1.04  | 6.04  | 0.31  | 0.73 | 0.36 | 0.24  | 0.37   | 0.40  | 1.60   | 0.56    | 0.99    |  |
| 52  | AF801F | Colony bred | M1/M1           | M1/M1        | 1.32             | 2.20 | 1.72  | 3.27  | 1.78  | 1.48  | 1.50  | 1.48 | 1.52 | 1.17  | 4.52   | 1.47  | 1.56   | 2.19    | 1.61    |  |
| 53  | AH121H | Colony bred | M3/M3           | M3/M3        | 2.47             | 0.69 | 0.77  | 1.03  | 0.74  | 0.62  | 0.52  | 0.80 | 0.66 | 0.41  | 0.74   | 0.61  | 0.53   | 0.74    | 0.87    |  |

|     |         |              |              |       |       |       |       |       |       |       |      |       |       |        |       |       |       |        |
|-----|---------|--------------|--------------|-------|-------|-------|-------|-------|-------|-------|------|-------|-------|--------|-------|-------|-------|--------|
| 54  | AK101C  | Colony bred  | M3/M6        | 0.89  | 1.68  | 0.89  | 28.73 | 51.19 | 1.54  | 1.20  | 1.39 | 0.90  | 0.41  | 0.87   | 1.02  | 0.86  | 2.70  | 2.41   |
| 55  | AK143F  | Colony bred  | M1/M5        | 0.65  | 0.65  | 0.71  | 1.02  | 0.74  | 0.92  | 0.55  | 0.98 | 0.60  | 0.44  | 0.81   | 0.56  | 0.64  | 2.01  | 1.05   |
| 56  | AK178F  | Colony bred  | M2/M2        | 3.56  | 6.38  | 3.56  | 4.26  | 3.53  | 3.61  | 5.38  | 3.36 | 5.13  | 2.68  | 5.51   | 5.10  | 5.13  | 5.04  | 3.33   |
| 57  | AK492H  | Colony bred  | M1/recM4M1   | 0.30  | 0.32  | 0.39  | 0.79  | 0.59  | 0.65  | 0.28  | 0.59 | 0.31  | 0.22  | 0.43   | 0.31  | 0.33  | 0.39  | 1.44   |
| 58  | AK751E  | Colony bred  | recM2M6/M2   | 0.79  | 0.48  | 0.62  | 1.09  | 0.98  | 0.73  | 0.37  | 0.81 | 0.51  | 0.53  | 0.73   | 0.55  | 0.56  | 0.74  | 1.50   |
| 59  | AK820D  | Colony bred  | recM2M1/M2   | 0.67  | 0.50  | 0.74  | 1.46  | 0.87  | 1.19  | 0.34  | 2.04 | 0.57  | 0.30  | 0.40   | 0.59  | 0.33  | 0.62  | 8.77   |
| 60  | AK944F  | Colony bred  | M2/recM2M1   | 0.33  | 6.33  | 0.74  | 2.16  | 0.80  | 1.07  | 1.32  | 0.93 | 15.77 | 0.30  | 1.08   | 0.98  | 0.46  | 0.89  | 1.23   |
| 61  | AL871C  | Colony bred  | M2/M4        | 5.07  | 7.39  | 9.87  | 7.86  | 7.20  | 4.74  | 5.72  | 4.47 | 5.62  | 9.41  | 4.83   | 6.40  | 3.16  | 5.59  | 4.40   |
| 62  | AL891C  | Colony bred  | M1/M5        | 0.95  | 0.69  | 0.86  | 1.49  | 0.77  | 0.83  | 3.87  | 0.98 | 0.72  | 0.61  | 2.28   | 0.79  | 0.80  | 2.31  | 1.05   |
| 63  | AM414E  | Colony bred  | M1/M2        | 0.36  | 0.57  | 0.46  | 1.00  | 0.62  | 0.53  | 0.46  | 0.65 | 0.36  | 0.27  | 0.52   | 0.43  | 0.40  | 0.50  | 0.81   |
| 64  | AM541D  | Colony bred  | M2/M3        | 1.42  | 2.20  | 3.01  | 2.54  | 1.72  | 1.30  | 1.70  | 1.51 | 1.67  | 2.55  | 1.92   | 1.64  | 1.16  | 3.64  | 1.76   |
| 65  | AN984C  | Colony bred  | recM1M4/M1   | 1.30  | 1.48  | 3.04  | 7.65  | 2.73  | 3.54  | 1.42  | 4.50 | 1.42  | 1.01  | 113.94 | 1.70  | 1.21  | 2.58  | 71.76  |
| 66  | AT1555A | Colony bred  | M1/M2        | 0.50  | 0.54  | 0.70  | 4.79  | 0.80  | 1.13  | 0.58  | 0.89 | 1.21  | 0.39  | 0.65   | 2.74  | 0.47  | 0.74  | 1.17   |
| 67  | BF117F  | Colony bred  | M4/M4        | 0.65  | 2.71  | 0.68  | 1.15  | 0.92  | 0.77  | 0.81  | 0.93 | 0.65  | 0.39  | 112.31 | 0.73  | 0.56  | 1.10  | 1.17   |
| 68  | GA138H  | Colony bred  | M1/recM2M1   | 0.76  | 0.71  | 0.46  | 1.03  | 0.62  | 0.70  | 0.44  | 0.65 | 0.48  | 0.33  | 0.81   | 1.41  | 0.47  | 0.56  | 0.64   |
| 69  | BF325D  | Colony bred  | M2/M2        | 1.33  | 16.38 | 0.83  | 2.08  | 1.16  | 2.13  | 1.35  | 1.23 | 0.66  | 0.53  | 2.59   | 0.81  | 0.73  | 1.54  | 3.66   |
| 70  | BF71G   | Colony bred  | M1/M5        | 2.40  | 4.05  | 2.95  | 46.41 | 2.18  | 3.56  | 3.08  | 2.36 | 25.05 | 2.13  | 3.81   | 15.39 | 3.24  | 3.70  | 24.00  |
| 71  | BF790B  | Colony bred  | M2/M3        | 0.47  | 0.53  | 0.56  | 1.53  | 0.56  | 0.79  | 0.33  | 0.92 | 0.45  | 0.36  | 0.61   | 0.52  | 0.62  | 1.17  | 2.09   |
| 72  | BF989C  | Colony bred  | M1/M3        | 0.65  | 0.73  | 0.56  | 0.76  | 0.73  | 1.51  | 0.68  | 1.02 | 0.45  | 0.39  | 1.20   | 0.58  | 0.56  | 1.04  | 2.44   |
| 73  | BM38B   | Colony bred  | M1/M3        | 0.64  | 0.99  | 0.68  | 4.56  | 2.83  | 2.06  | 0.52  | 1.10 | 0.63  | 0.27  | 0.86   | 0.64  | 0.77  | 1.48  | 183.14 |
| 74  | BM48B   | Colony bred  | M2/M3        | 11.61 | 18.01 | 18.43 | 13.27 | 11.70 | 6.95  | 14.93 | 8.96 | 15.79 | 17.60 | 9.88   | 13.24 | 9.61  | 14.61 | 9.38   |
| 75  | E143NB  | Colony bred  | M1/M2        | 5.04  | 1.40  | 1.39  | 1.77  | 1.45  | 4.00  | 0.95  | 1.81 | 1.08  | 0.83  | 6.21   | 1.14  | 1.39  | 1.75  | 7.94   |
| 76  | F823FH  | Colony bred  | M1/M4        | 0.30  | 0.39  | 0.40  | 0.68  | 0.56  | 0.49  | 0.50  | 0.56 | 0.56  | 0.30  | 0.67   | 0.40  | 0.37  | 0.83  | 0.90   |
| 77  | GA828A  | Colony bred  | M1/M3        | 0.44  | 0.47  | 0.56  | 1.16  | 14.25 | 0.86  | 0.47  | 0.61 | 0.48  | 0.36  | 0.55   | 0.35  | 0.39  | 0.59  | 1.57   |
| 78  | GA916A  | Colony bred  | recM4M6/M4   | 0.33  | 0.48  | 0.50  | 26.54 | 1.39  | 0.56  | 0.33  | 0.74 | 0.31  | 0.27  | 0.36   | 0.37  | 0.83  | 0.62  | 1.23   |
| 79  | GR35BI  | Colony bred  | M1/M4        | 0.92  | 1.08  | 1.42  | 3.82  | 2.73  | 1.78  | 1.32  | 2.01 | 0.84  | 0.68  | 0.84   | 0.99  | 0.96  | 1.30  | 3.19   |
| 80  | GR503K  | Colony bred  | M1/M3        | 0.84  | 0.66  | 0.80  | 1.49  | 1.02  | 1.01  | 0.84  | 1.01 | 0.63  | 0.39  | 0.90   | 0.61  | 0.59  | 1.16  | 2.18   |
| 81  | GR924L  | Colony bred  | M3/M2        | 1.83  | 1.00  | 0.90  | 3.79  | 1.73  | 24.40 | 0.74  | 1.16 | 0.85  | 0.55  | 1.67   | 2.12  | 0.73  | 5.24  | 1.11   |
| 82  | HT01AK  | Colony bred  | M5/recM2M3M1 | 1.42  | 1.55  | 2.30  | 5.03  | 2.31  | 1.44  | 1.23  | 2.00 | 5.25  | 2.01  | 97.27  | 1.35  | 0.84  | 1.29  | 2.01   |
| 83  | JA89CL  | Colony bred  | M1/M4        | 0.77  | 0.82  | 0.98  | 1.77  | 0.98  | 0.95  | 0.93  | 0.98 | 0.76  | 0.56  | 1.29   | 1.32  | 0.62  | 0.92  | 1.26   |
| 84  | JR19C   | Colony bred  | M1/M4        | 3.08  | 0.47  | 0.61  | 1.48  | 1.20  | 1.81  | 44.86 | 0.77 | 0.45  | 0.33  | 0.79   | 0.52  | 0.50  | 1.01  | 2.68   |
| 85  | LP84B   | Colony bred  | M3/M1        | 0.71  | 0.71  | 0.77  | 3.67  | 1.42  | 0.73  | 0.46  | 0.98 | 0.57  | 0.42  | 0.30   | 0.67  | 0.89  | 2.22  | 1.29   |
| 86  | BF541C  | Colony bred  | M1/M6        | 4.89  | 0.47  | 0.56  | 0.97  | 0.77  | 0.44  | 0.37  | 0.61 | 0.42  | 0.30  | 1.13   | 0.44  | 1.26  | 0.65  | 1.24   |
| 87  | RAM1GAD | Colony bred  | recM4M6/M4   | 2.34  | 3.59  | 2.52  | 2.69  | 2.96  | 2.28  | 2.71  | 3.26 | 2.36  | 1.72  | 3.30   | 3.01  | 2.53  | 2.15  | 2.37   |
| 88  | S23K    | Colony bred  | M1/M4        | 0.86  | 0.75  | 0.83  | 2.04  | 1.39  | 0.86  | 0.90  | 1.02 | 0.84  | 0.39  | 1.23   | 0.73  | 0.64  | 0.89  | 1.14   |
| 89  | S309CG  | Colony bred  | M4/M4        | 3.59  | 0.39  | 0.39  | 6.48  | 0.46  | 0.50  | 0.34  | 0.59 | 0.36  | 0.22  | 0.43   | 0.31  | 0.30  | 0.62  | 8.46   |
| 90  | SZ48B   | Colony bred  | M4/recM1M2   | 0.41  | 0.51  | 0.74  | 1.27  | 0.68  | 0.44  | 0.34  | 0.56 | 0.48  | 0.46  | 12.47  | 0.46  | 0.21  | 0.56  | 23.10  |
| 91  | T392AG  | Colony bred  | M3/recM3M4   | 0.33  | 0.75  | 0.59  | 2.32  | 0.67  | 0.62  | 0.37  | 0.77 | 0.41  | 0.30  | 89.57  | 0.49  | 0.52  | 0.56  | 0.84   |
| 92  | V67J    | Colony bred  | M1/M1        | 1.90  | 3.19  | 3.81  | 6.22  | 2.68  | 1.82  | 6.56  | 2.00 | 2.45  | 2.52  | 1.91   | 1.96  | 1.50  | 2.68  | 2.96   |
| 93  | YR335N  | Colony bred  | M1/recM4M6   | 0.33  | 0.42  | 0.50  | 60.96 | 1.04  | 0.67  | 0.28  | 0.62 | 0.87  | 0.27  | 0.46   | 0.49  | 0.36  | 0.74  | 1.05   |
| 94  | Z518DD  | Colony bred  | recM1M5/M3   | 1.42  | 0.59  | 0.62  | 0.97  | 1.04  | 0.81  | 0.49  | 0.77 | 0.45  | 0.33  | 0.55   | 0.46  | 0.49  | 1.01  | 1.32   |
| 95  | AM260D  | Capture bred | M1/M4        | 1.05  | 1.41  | 1.36  | 2.13  | 3.39  | 1.44  | 1.60  | 1.90 | 0.74  | 0.59  | 186.46 | 1.25  | 2.45  | 1.77  | 1.84   |
| 96  | AM672   | Capture bred | M1/M6        | 36.68 | 1.84  | 1.86  | 2.18  | 2.68  | 2.36  | 33.77 | 2.42 | 1.58  | 1.21  | 8.01   | 2.04  | 13.58 | 2.64  | 2.41   |
| 97  | AT789   | Capture bred | M1/M3        | 2.06  | 0.79  | 0.98  | 1.12  | 4.28  | 0.91  | 7.62  | 1.17 | 0.62  | 0.53  | 0.60   | 0.85  | 1.27  | 1.56  | 1.72   |
| 98  | AV187   | Capture bred | M7/M4        | 0.49  | 0.45  | 0.70  | 2.12  | 0.66  | 0.68  | 6.80  | 0.75 | 0.40  | 0.33  | 0.52   | 0.94  | 0.63  | 0.59  | 0.85   |
| 99  | AV429   | Capture bred | M1/M2        | 0.96  | 1.03  | 1.46  | 2.72  | 2.08  | 2.50  | 2.42  | 2.16 | 0.68  | 0.43  | 13.52  | 0.92  | 1.20  | 15.65 | 1.82   |
| 100 | BM524   | Capture bred | M2/M6        | 3.25  | 0.74  | 1.24  | 0.96  | 1.70  | 1.20  | 0.82  | 1.60 | 0.64  | 0.46  | 1.69   | 0.68  | 1.17  | 0.98  | 4.92   |
| 101 | BM576   | Capture bred | M1/M3        | 2.12  | 1.32  | 1.59  | 3.12  | 6.09  | 1.51  | 1.09  | 2.22 | 0.80  | 0.70  | 10.12  | 1.02  | 1.45  | 3.39  | 1.60   |
| 102 | BM795   | Capture bred | M3/M4        | 0.68  | 0.73  | 0.80  | 0.57  | 1.75  | 1.24  | 3.98  | 0.89 | 0.70  | 0.48  | 1.35   | 0.59  | 2.16  | 1.72  | 1.28   |
| 103 | AM271   | Capture bred | M3/M5        | 5.43  | 0.54  | 0.98  | 0.75  | 1.00  | 0.74  | 0.47  | 1.22 | 0.56  | 0.36  | 7.45   | 0.51  | 0.58  | 0.57  | 1.64   |
| 104 | AT45    | Capture bred | M1/recM1M3   | 1.60  | 1.25  | 1.36  | 7.61  | 1.61  | 1.19  | 0.87  | 1.91 | 0.69  | 0.70  | 5.11   | 0.84  | 1.27  | 7.68  | 1.71   |
| 105 | BM796   | Capture bred | M3/M4        | 1.47  | 2.13  | 5.29  | 2.60  | 6.42  | 2.07  | 80.35 | 2.28 | 2.40  | 1.76  | 10.27  | 1.35  | 10.20 | 2.03  | 2.25   |
| 106 | BM805   | Capture bred | M1/M4        | 1.04  | 1.20  | 1.62  | 1.33  | 2.72  | 1.00  | 0.93  | 1.91 | 0.98  | 0.48  | 148.85 | 0.65  | 1.05  | 0.89  | 1.98   |
| 107 | BM843   | Capture bred | M3/M4        | 0.48  | 0.61  | 1.10  | 5.83  | 1.45  | 0.96  | 2.45  | 1.16 | 0.40  | 0.36  | 264.26 | 0.87  | 1.05  | 1.21  | 1.61   |
| 108 | BM280   | Capture bred | M3/M3        | 70.81 | 0.83  | 1.22  | 1.48  | 2.10  | 1.89  | 5.99  | 2.05 | 0.81  | 0.63  | 12.70  | 1.80  | 1.20  | 3.97  | 1.92   |

**Table B panel a.** Univariate analysis of the effects of MHC haplotypes on natural antibodies to SIV PCS1.

| MHC I<br>haplotype | No.(%) of monkeys |         | P value <sup>a</sup> | MHC II<br>haplotype | No.(%) of monkeys |         | P value <sup>a</sup> |
|--------------------|-------------------|---------|----------------------|---------------------|-------------------|---------|----------------------|
|                    | Ab high           | Ab low  |                      |                     | Ab high           | Ab low  |                      |
| M1                 | 12 (24)           | 38 (76) | 0.4898               | M1                  | 12 (21)           | 46 (79) | 0.0883               |
| Non-M1             | 14 (32)           | 30 (68) |                      | Non-M1              | 18 (36)           | 32 (64) |                      |
| M2                 | 9 (38)            | 15 (62) | 0.2013               | M2                  | 12 (36)           | 21 (64) | 0.2437               |
| Non-M2             | 18 (24)           | 57 (76) |                      | Non-M2              | 18 (24)           | 57 (76) |                      |
| M3                 | 11 (29)           | 27 (71) | 1.0000               | M3                  | 12 (31)           | 27 (69) | 0.6597               |
| Non-M3             | 17 (28)           | 43 (72) |                      | Non-M3              | 18 (26)           | 50 (74) |                      |
| M4                 | 7 (23)            | 23 (77) | 0.6256               | M4                  | 9 (26)            | 26 (74) | 0.8192               |
| Non-M4             | 20 (30)           | 46 (70) |                      | Non-M4              | 21 (30)           | 49 (70) |                      |
| M5                 | 2 (25)            | 6 (75)  | 1.0000               | M5                  | 3 (25)            | 9 (75)  | 1.0000               |
| Non-M5             | 27 (28)           | 68 (72) |                      | Non-M5              | 27 (28)           | 69 (72) |                      |
| M6                 | 4 (29)            | 10 (71) | 1.0000               | M6                  | 4 (36)            | 7 (64)  | 0.4989               |
| Non-M6             | 25 (28)           | 65 (72) |                      | Non-M6              | 25 (27)           | 67 (73) |                      |
| M7                 | 2 (50)            | 2 (50)  | 0.3080               | M7                  | 2 (67)            | 1 (33)  | 0.1991               |
| Non-M7             | 28 (27)           | 76 (73) |                      | Non-M7              | 28 (28)           | 73 (72) |                      |

a. Fisher's exact test (uncorrected p value).

Recombinant haplotypes for MHC I or MHC II were excluded from analysis.

Ab high,  $\geq 2$  ng/ml; Ab low,  $< 2$  ng/ml.

**Table B panel b.** Univariate analysis of the effects of MHC haplotypes on natural antibodies to SIV PCS2.

| MHC I<br>haplotype | No.(%) of monkeys |         | P value <sup>a</sup> | MHC II<br>haplotype | No.(%) of monkeys |         | P value <sup>a</sup> |
|--------------------|-------------------|---------|----------------------|---------------------|-------------------|---------|----------------------|
|                    | Ab high           | Ab low  |                      |                     | Ab high           | Ab low  |                      |
| M1                 | 9 (18)            | 41 (82) | 0.1515               | M1                  | 11 (19)           | 47 (81) | 0.0833               |
| Non-M1             | 14 (32)           | 30 (68) |                      | Non-M1              | 17 (34)           | 33 (66) |                      |
| M2                 | 11 (46)           | 13 (54) | 0.0137               | M2                  | 14 (42)           | 19 (58) | 0.0160               |
| Non-M2             | 14 (19)           | 61 (81) |                      | Non-M2              | 14 (19)           | 61 (81) |                      |
| M3                 | 9 (24)            | 29 (76) | 0.6470               | M3                  | 10 (26)           | 29 (74) | 1.0000               |
| Non-M3             | 17 (28)           | 43 (72) |                      | Non-M3              | 18 (26)           | 50 (74) |                      |
| M4                 | 6 (20)            | 24 (80) | 0.3326               | M4                  | 7 (20)            | 28 (80) | 0.3517               |
| Non-M4             | 20 (30)           | 46 (70) |                      | Non-M4              | 21 (30)           | 49 (70) |                      |
| M5                 | 4 (50)            | 4 (50)  | 0.1084               | M5                  | 5 (42)            | 7 (58)  | 0.2916               |
| Non-M5             | 22 (23)           | 73 (77) |                      | Non-M5              | 23 (24)           | 73 (76) |                      |
| M6                 | 2 (14)            | 12 (86) | 0.3483               | M6                  | 1 (9)             | 10 (91) | 0.2826               |
| Non-M6             | 25 (28)           | 65 (72) |                      | Non-M6              | 25 (27)           | 67 (73) |                      |
| M7                 | 0 (0)             | 4 (100) | 0.5707               | M7                  | 0 (0)             | 3 (100) | 0.5618               |
| Non-M7             | 28 (27)           | 76 (73) |                      | Non-M7              | 28 (28)           | 73 (72) |                      |

a. Fisher's exact test (uncorrected p value).

Recombinant haplotypes for MHC I or MHC II were excluded from analysis.

Ab high,  $\geq 2$  ng/ml; Ab low,  $< 2$  ng/ml.

**Table B panel c.** Univariate analysis of the effects of MHC haplotypes on natural antibodies to SIV PCS3.

| MHC I<br>haplotype | No.(%) of monkeys |         | P value <sup>a</sup> | MHC II<br>haplotype | No.(%) of monkeys |         | P value <sup>a</sup> |
|--------------------|-------------------|---------|----------------------|---------------------|-------------------|---------|----------------------|
|                    | Ab high           | Ab low  |                      |                     | Ab high           | Ab low  |                      |
| M1                 | 6 (12)            | 44 (86) | 0.1159               | M1                  | 8 (14)            | 50 (86) | 0.0934               |
| Non-M1             | 11 (25)           | 33 (75) |                      | Non-M1              | 14 (28)           | 36 (72) |                      |
| M2                 | 7 (29)            | 17 (71) | 0.2313               | M2                  | 10 (30)           | 23 (70) | 0.1195               |
| Non-M2             | 12 (16)           | 63 (84) |                      | Non-M2              | 12 (16)           | 63 (84) |                      |
| M3                 | 9 (24)            | 29 (76) | 0.6094               | M3                  | 9 (23)            | 30 (77) | 0.6281               |
| Non-M3             | 11 (18)           | 49 (82) |                      | Non-M3              | 13 (19)           | 55 (81) |                      |
| M4                 | 6 (20)            | 24 (80) | 1.0000               | M4                  | 8 (23)            | 27 (77) | 0.8010               |
| Non-M4             | 13 (20)           | 53 (80) |                      | Non-M4              | 14 (20)           | 56 (80) |                      |
| M5                 | 3 (38)            | 5 (62)  | 0.3629               | M5                  | 4 (33)            | 8 (67)  | 0.2597               |
| Non-M5             | 19 (20)           | 76 (80) |                      | Non-M5              | 18 (19)           | 78 (81) |                      |
| M6                 | 2 (14)            | 12 (86) | 0.7300               | M6                  | 2 (18)            | 9 (82)  | 1.0000               |
| Non-M6             | 19 (21)           | 71 (79) |                      | Non-M6              | 19 (21)           | 73 (79) |                      |
| M7                 | 0 (0)             | 4 (100) | 0.5799               | M7                  | 0 (0)             | 3 (100) | 1.0000               |
| Non-M7             | 22 (21)           | 82 (79) |                      | Non-M7              | 22 (22)           | 79 (78) |                      |

a. Fisher's exact test (uncorrected p value).

Recombinant haplotypes for MHC I or MHC II were excluded from analysis.

Ab high,  $\geq 2$  ng/ml; Ab low,  $< 2$  ng/ml.

**Table B panel d.** Univariate analysis of the effects of MHC haplotypes on natural antibodies to SIV PCS4.

| MHC I<br>haplotype | No.(%) of monkeys |         | P value <sup>a</sup> | MHC II<br>haplotype | No.(%) of monkeys |         | P value <sup>a</sup> |
|--------------------|-------------------|---------|----------------------|---------------------|-------------------|---------|----------------------|
|                    | Ab high           | Ab low  |                      |                     | Ab high           | Ab low  |                      |
| M1                 | 25 (50)           | 25 (50) | 0.6842               | M1                  | 30 (52)           | 28 (48) | 0.8471               |
| Non-M1             | 20 (45)           | 24 (55) |                      | Non-M1              | 24 (48)           | 26 (52) |                      |
| M2                 | 9 (38)            | 15 (62) | 0.1592               | M2                  | 14 (42)           | 19 (58) | 0.4036               |
| Non-M2             | 42 (56)           | 33 (44) |                      | Non-M2              | 40 (53)           | 35 (47) |                      |
| M3                 | 19 (50)           | 19 (50) | 1.0000               | M3                  | 17 (44)           | 22 (56) | 0.4231               |
| Non-M3             | 31 (52)           | 29 (48) |                      | Non-M3              | 36 (53)           | 32 (47) |                      |
| M4                 | 15 (50)           | 15 (50) | 0.8280               | M4                  | 18 (51)           | 17 (49) | 0.8377               |
| Non-M4             | 31 (47)           | 35 (53) |                      | Non-M4              | 34 (49)           | 36 (51) |                      |
| M5                 | 4 (50)            | 4 (50)  | 1.0000               | M5                  | 7 (58)            | 5 (42)  | 0.7608               |
| Non-M5             | 47 (49)           | 48 (51) |                      | Non-M5              | 47 (49)           | 49 (51) |                      |
| M6                 | 7 (50)            | 7 (50)  | 1.0000               | M6                  | 5 (45)            | 6 (55)  | 1.0000               |
| Non-M6             | 44 (49)           | 46 (51) |                      | Non-M6              | 45 (49)           | 47 (51) |                      |
| M7                 | 2(50)             | 2 (50)  | 1.0000               | M7                  | 1 (33)            | 2 (67)  | 1.0000               |
| Non-M7             | 52 (50)           | 52 (50) |                      | Non-M7              | 50 (50)           | 51 (50) |                      |

a. Fisher's exact test (uncorrected p value).

Recombinant haplotypes for MHC I or MHC II were excluded from analysis.

Ab high,  $\geq 2$  ng/ml; Ab low,  $< 2$  ng/ml.



**Table B panel e.** Univariate analysis of the effects of MHC haplotypes on natural antibodies to SIV PCS5.

| MHC I<br>haplotype | No.(%) of monkeys |         | P value <sup>a</sup> | MHC II<br>haplotype | No.(%) of monkeys |         | P value <sup>a</sup> |
|--------------------|-------------------|---------|----------------------|---------------------|-------------------|---------|----------------------|
|                    | Ab high           | Ab low  |                      |                     | Ab high           | Ab low  |                      |
| M1                 | 19 (38)           | 31 (62) | 0.2829               | M1                  | 16 (28)           | 42 (72) | 0.6754               |
| Non-M1             | 12 (27)           | 32 (73) |                      | Non-M1              | 16 (32)           | 34 (68) |                      |
| M2                 | 5 (21)            | 19 (79) | 0.2138               | M2                  | 9 (27)            | 24 (73) | 0.6543               |
| Non-M2             | 27 (36)           | 48 (64) |                      | Non-M2              | 25 (33)           | 50 (67) |                      |
| M3                 | 16 (42)           | 22 (58) | 0.2773               | M3                  | 14 (36)           | 25 (64) | 0.6702               |
| Non-M3             | 18 (30)           | 42 (70) |                      | Non-M3              | 21 (31)           | 47 (69) |                      |
| M4                 | 10 (33)           | 20 (67) | 1.0000               | M4                  | 11 (31)           | 24 (69) | 0.8289               |
| Non-M4             | 23 (35)           | 43 (65) |                      | Non-M4              | 24 (34)           | 46 (66) |                      |
| M5                 | 3 (38)            | 5 (62)  | 1.0000               | M5                  | 5 (42)            | 7 (58)  | 0.5198               |
| Non-M5             | 31 (33)           | 64 (67) |                      | Non-M5              | 30 (31)           | 66 (69) |                      |
| M6                 | 4 (29)            | 10 (71) | 1.0000               | M6                  | 4 (36)            | 7 (64)  | 1.0000               |
| Non-M6             | 30 (33)           | 60 (67) |                      | Non-M6              | 30 (33)           | 62 (67) |                      |
| M7                 | 2(50)             | 2 (50)  | 0.5938               | M7                  | 2 (67)            | 1 (33)  | 0.2614               |
| Non-M7             | 33 (32)           | 71 (68) |                      | Non-M7              | 33 (33)           | 68 (67) |                      |

a. Fisher's exact test (uncorrected p value).

Recombinant haplotypes for MHC I or MHC II were excluded from analysis.

Ab high,  $\geq 2$  ng/ml; Ab low,  $< 2$  ng/ml.

**Table B panel f.** Univariate analysis of the effects of MHC haplotypes on natural antibodies to SIV PCS6.

| MHC I<br>haplotype | No.(%) of monkeys |         | P value <sup>a</sup> | MHC II<br>haplotype | No.(%) of monkeys |         | P value <sup>a</sup> |
|--------------------|-------------------|---------|----------------------|---------------------|-------------------|---------|----------------------|
|                    | Ab high           | Ab low  |                      |                     | Ab high           | Ab low  |                      |
| M1                 | 9 (18)            | 41 (82) | 0.3270               | M1                  | 11 (19)           | 47 (81) | 0.3606               |
| Non-M1             | 12 (27)           | 32 (73) |                      | Non-M1              | 14 (28)           | 36 (72) |                      |
| M2                 | 8 (33)            | 16 (67) | 0.1611               | M2                  | 11 (27)           | 22 (73) | 0.1362               |
| Non-M2             | 14 (19)           | 61 (81) |                      | Non-M2              | 14 (33)           | 61 (67) |                      |
| M3                 | 8 (21)            | 30 (79) | 0.6327               | M3                  | 6 (15)            | 33 (85) | 0.3297               |
| Non-M3             | 16 (27)           | 44 (73) |                      | Non-M3              | 17 (25)           | 51 (75) |                      |
| M4                 | 5 (17)            | 25 (83) | 0.5949               | M4                  | 8 (23)            | 27 (77) | 1.0000               |
| Non-M4             | 16 (24)           | 50 (76) |                      | Non-M4              | 17 (24)           | 53 (76) |                      |
| M5                 | 2 (25)            | 6 (75)  | 1.0000               | M5                  | 4 (42)            | 8 (58)  | 0.4672               |
| Non-M5             | 21 (22)           | 74 (78) |                      | Non-M5              | 21 (31)           | 75 (69) |                      |
| M6                 | 4 (29)            | 10 (71) | 0.7333               | M6                  | 3 (27)            | 8 (73)  | 0.7152               |
| Non-M6             | 20 (22)           | 70 (78) |                      | Non-M6              | 21 (23)           | 71 (77) |                      |
| M7                 | 0 (0)             | 4 (100) | 0.5714               | M7                  | 0 (0)             | 3 (100) | 1.0000               |
| Non-M7             | 25 (24)           | 79 (76) |                      | Non-M7              | 25 (25)           | 76 (75) |                      |

a. Fisher's exact test (uncorrected p value).

Recombinant haplotypes for MHC I or MHC II were excluded from analysis.

Ab high,  $\geq 2$  ng/ml; Ab low,  $< 2$  ng/ml.

**Table B panel g.** Univariate analysis of the effects of MHC haplotypes on natural antibodies to SIV PCS7.

| MHC I<br>haplotype | No.(%) of monkeys |         | P value <sup>a</sup> | MHC II<br>haplotype | No.(%) of monkeys |         | P value <sup>a</sup> |
|--------------------|-------------------|---------|----------------------|---------------------|-------------------|---------|----------------------|
|                    | Ab high           | Ab low  |                      |                     | Ab high           | Ab low  |                      |
| M1                 | 10 (20)           | 40 (80) | 0.1615               | M1                  | 12 (21)           | 46 (79) | 0.1331               |
| Non-M1             | 15 (34)           | 29 (66) |                      | Non-M1              | 14 (34)           | 33 (66) |                      |
| M2                 | 8 (33)            | 16 (67) | 0.4423               | M2                  | 10 (30)           | 23 (70) | 0.6406               |
| Non-M2             | 19 (25)           | 56 (75) |                      | Non-M2              | 19 (25)           | 56 (75) |                      |
| M3                 | 11 (29)           | 27 (71) | 0.8202               | M3                  | 12 (31)           | 27 (69) | 0.4944               |
| Non-M3             | 16 (27)           | 44 (73) |                      | Non-M3              | 16 (24)           | 52 (76) |                      |
| M4                 | 10 (33)           | 20 (67) | 0.4701               | M4                  | 11 (31)           | 24 (69) | 0.6441               |
| Non-M4             | 17 (26)           | 49 (74) |                      | Non-M4              | 18 (26)           | 52 (74) |                      |
| M5                 | 3 (38)            | 5 (62)  | 0.4290               | M5                  | 4 (33)            | 8 (67)  | 0.7303               |
| Non-M5             | 24 (25)           | 71 (75) |                      | Non-M5              | 25 (26)           | 71 (74) |                      |
| M6                 | 3 (21)            | 11 (79) | 0.7542               | M6                  | 3 (27)            | 8 (73)  | 1.0000               |
| Non-M6             | 25 (28)           | 65 (72) |                      | Non-M6              | 25 (27)           | 67 (73) |                      |
| M7                 | 1 (25)            | 3 (75)  | 1.0000               | M7                  | 0 (0)             | 3 (100) | 0.5618               |
| Non-M7             | 28 (27)           | 76 (73) |                      | Non-M7              | 28 (28)           | 73 (72) |                      |

a. Fisher's exact test (uncorrected p value).

Recombinant haplotypes for MHC I or MHC II were excluded from analysis.

Ab high,  $\geq 2$  ng/ml; Ab low,  $< 2$  ng/ml.

**Table B panel h.** Univariate analysis of the effects of MHC haplotypes on natural antibodies to SIV PCS8.

| MHC I<br>haplotype | No.(%) of monkeys |         | P value <sup>a</sup> | MHC II<br>haplotype | No.(%) of monkeys |         | P value <sup>a</sup> |
|--------------------|-------------------|---------|----------------------|---------------------|-------------------|---------|----------------------|
|                    | Ab high           | Ab low  |                      |                     | Ab high           | Ab low  |                      |
| M1                 | 11 (22)           | 39 (78) | 1.0000               | M1                  | 14 (24)           | 44 (76) | 1.0000               |
| Non-M1             | 9 (20)            | 35 (80) |                      | Non-M1              | 12 (24)           | 38 (76) |                      |
| M2                 | 8 (33)            | 16 (67) | 0.2654               | M2                  | 9 (27)            | 24 (73) | 0.6305               |
| Non-M2             | 15 (20)           | 60 (80) |                      | Non-M2              | 17 (22)           | 58 (78) |                      |
| M3                 | 6 (16)            | 32 (84) | 0.3203               | M3                  | 9 (23)            | 30 (77) | 1.0000               |
| Non-M3             | 16 (27)           | 44 (73) |                      | Non-M3              | 17 (25)           | 51 (75) |                      |
| M4                 | 6 (20)            | 24 (80) | 0.7952               | M4                  | 7 (20)            | 28 (80) | 0.6299               |
| Non-M4             | 16 (24)           | 50 (76) |                      | Non-M4              | 18 (26)           | 52 (74) |                      |
| M5                 | 3 (38)            | 5 (62)  | 0.3981               | M5                  | 5 (33)            | 7 (67)  | 0.1558               |
| Non-M5             | 22 (23)           | 73 (77) |                      | Non-M5              | 21 (26)           | 75 (74) |                      |
| M6                 | 3 (21)            | 11 (79) | 1.0000               | M6                  | 2 (18)            | 9 (82)  | 1.0000               |
| Non-M6             | 22 (24)           | 68 (76) |                      | Non-M6              | 23 (25)           | 69 (75) |                      |
| M7                 | 0 (0)             | 4 (100) | 0.5703               | M7                  | 0 (0)             | 3 (100) | 0.5712               |
| Non-M7             | 26 (25)           | 78 (75) |                      | Non-M7              | 26 (26)           | 75 (74) |                      |

a. Fisher's exact test (uncorrected p value).

Recombinant haplotypes for MHC I or MHC II were excluded from analysis.

Ab high,  $\geq 2$  ng/ml; Ab low,  $< 2$  ng/ml.

**Table B panel i.** Univariate analysis of the effects of MHC haplotypes on natural antibodies to SIV PCS9.

| MHC I<br>haplotype | No.(%) of monkeys |         | P value <sup>a</sup> | MHC II<br>haplotype | No.(%) of monkeys |         | P value <sup>a</sup> |
|--------------------|-------------------|---------|----------------------|---------------------|-------------------|---------|----------------------|
|                    | Ab high           | Ab low  |                      |                     | Ab high           | Ab low  |                      |
| M1                 | 6 (12)            | 44 (88) | 0.5629               | M1                  | 10 (17)           | 48 (83) | 0.8057               |
| Non-M1             | 8 (18)            | 36 (82) |                      | Non-M1              | 10 (20)           | 40 (80) |                      |
| M2                 | 7 (29)            | 17 (71) | 0.1319               | M2                  | 8 (24)            | 25 (76) | 0.4199               |
| Non-M2             | 11 (15)           | 64 (85) |                      | Non-M2              | 12 (16)           | 63 (84) |                      |
| M3                 | 7 (18)            | 31 (82) | 1.0000               | M3                  | 8 (20)            | 31 (80) | 0.7983               |
| Non-M3             | 10 (17)           | 50 (83) |                      | Non-M3              | 12 (18)           | 56 (82) |                      |
| M4                 | 5 (17)            | 25 (83) | 1.0000               | M4                  | 6 (17)            | 29 (83) | 0.7977               |
| Non-M4             | 11 (17)           | 55 (83) |                      | Non-M4              | 14 (20)           | 56 (80) |                      |
| M5                 | 2 (25)            | 6 (75)  | 0.6381               | M5                  | 3 (25)            | 9 (75)  | 0.6925               |
| Non-M5             | 17 (18)           | 78 (82) |                      | Non-M5              | 17 (18)           | 79 (82) |                      |
| M6                 | 1 (7)             | 13 (93) | 0.4571               | M6                  | 1 (9)             | 10 (91) | 0.6844               |
| Non-M6             | 18 (20)           | 72 (80) |                      | Non-M6              | 18 (20)           | 74 (80) |                      |
| M7                 | 0 (0)             | 4 (100) | 1.0000               | M7                  | 0 (0)             | 3 (100) | 1.0000               |
| Non-M7             | 20 (19)           | 84 (81) |                      | Non-M7              | 20 (20)           | 81 (80) |                      |

a. Fisher's exact test (uncorrected p value).

Recombinant haplotypes for MHC I or MHC II were excluded from analysis.

Ab high,  $\geq 2$  ng/ml; Ab low,  $< 2$  ng/ml.

**Table B panel j.** Univariate analysis of the effects of MHC haplotypes on natural antibodies to SIV PCS10.

| MHC I haplotype | No.(%) of monkeys |         | P value <sup>a</sup> | MHC II haplotype | No.(%) of monkeys |         | P value <sup>a</sup> |
|-----------------|-------------------|---------|----------------------|------------------|-------------------|---------|----------------------|
|                 | Ab high           | Ab low  |                      |                  | Ab high           | Ab low  |                      |
| M1              | 5 (10)            | 45 (90) | 0.7500               | M1               | 7 (12)            | 51 (88) | 0.5881               |
| Non-M1          | 6 (14)            | 38 (86) |                      | Non-M1           | 8 (16)            | 42 (84) |                      |
| M2              | 6 (25)            | 18 (75) | 0.0772               | M2               | 7 (21)            | 26 (79) | 0.2248               |
| Non-M2          | 7 (9)             | 68 (91) |                      | Non-M2           | 8 (11)            | 67 (89) |                      |
| M3              | 5 (13)            | 33 (87) | 1.0000               | M3               | 5 (13)            | 34 (87) | 1.0000               |
| Non-M3          | 8 (13)            | 52 (87) |                      | Non-M3           | 9 (13)            | 59 (87) |                      |
| M4              | 3 (10)            | 27 (90) | 0.7487               | M4               | 4 (11)            | 31 (89) | 0.7686               |
| Non-M4          | 10 (15)           | 56 (85) |                      | Non-M4           | 11 (16)           | 59 (84) |                      |
| M5              | 2 (25)            | 6 (75)  | 0.2972               | M5               | 3 (25)            | 9 (75)  | 0.3679               |
| Non-M5          | 12 (13)           | 83 (87) |                      | Non-M5           | 12 (13)           | 84 (87) |                      |
| M6              | 1 (7)             | 13 (93) | 0.6865               | M6               | 1 (9)             | 10 (91) | 0.7686               |
| Non-M6          | 13 (14)           | 77 (86) |                      | Non-M6           | 14 (15)           | 78 (85) |                      |
| M7              | 0 (0)             | 4 (100) | 1.0000               | M7               | 0 (0)             | 3 (100) | 1.0000               |
| Non-M7          | 15 (14)           | 89 (86) |                      | Non-M7           | 15 (15)           | 86 (85) |                      |

a. Fisher's exact test (uncorrected p value).

Recombinant haplotypes for MHC I or MHC II were excluded from analysis.

Ab high,  $\geq 2$  ng/ml; Ab low,  $< 2$  ng/ml.

**Table B panel k.** Univariate analysis of the effects of MHC haplotypes on natural antibodies to SIV PCS11.

| MHC I<br>haplotype | No.(%) of monkeys |         | P value <sup>a</sup> | MHC II<br>haplotype | No.(%) of monkeys |         | P value <sup>a</sup> |
|--------------------|-------------------|---------|----------------------|---------------------|-------------------|---------|----------------------|
|                    | Ab high           | Ab low  |                      |                     | Ab high           | Ab low  |                      |
| M1                 | 17 (34)           | 33 (66) | 0.4003               | M1                  | 19 (33)           | 39 (67) | 0.2411               |
| Non-M1             | 19 (43)           | 25 (57) |                      | Non-M1              | 22 (44)           | 28 (56) |                      |
| M2                 | 8 (33)            | 16 (67) | 1.0000               | M2                  | 14 (42)           | 19 (58) | 0.5279               |
| Non-M2             | 27 (36)           | 48 (64) |                      | Non-M2              | 27 (36)           | 48 (64) |                      |
| M3                 | 12 (32)           | 26 (68) | 0.3939               | M3                  | 13 (33)           | 26 (67) | 0.5360               |
| Non-M3             | 25 (42)           | 35 (58) |                      | Non-M3              | 28 (41)           | 40 (59) |                      |
| M4                 | 13 (43)           | 17 (57) | 0.6514               | M4                  | 16 (46)           | 19 (54) | 0.2906               |
| Non-M4             | 24 (36)           | 42 (64) |                      | Non-M4              | 24 (34)           | 46 (66) |                      |
| M5                 | 5 (63)            | 3 (37)  | 0.2561               | M5                  | 6 (50)            | 6 (50)  | 0.3660               |
| Non-M5             | 35 (37)           | 60 (63) |                      | Non-M5              | 35 (36)           | 61 (64) |                      |
| M6                 | 5 (36)            | 9 (64)  | 1.0000               | M6                  | 3 (27)            | 8 (73)  | 0.5274               |
| Non-M6             | 35 (39)           | 55 (61) |                      | Non-M6              | 36 (39)           | 56 (61) |                      |
| M7                 | 2 (50)            | 2 (50)  | 0.6335               | M7                  | 2 (67)            | 1 (33)  | 0.5572               |
| Non-M7             | 39 (38)           | 65 (62) |                      | Non-M7              | 38 (38)           | 63 (62) |                      |

a. Fisher's exact test (uncorrected p value).

Recombinant haplotypes for MHC I or MHC II were excluded from analysis.

Ab high,  $\geq 2$  ng/ml; Ab low,  $< 2$  ng/ml.

**Table B panel I.** Univariate analysis of the effects of MHC haplotypes on natural antibodies to SIV PCS12.

| MHC I<br>haplotype | No.(%) of monkeys |         | P value <sup>a</sup> | MHC II<br>haplotype | No.(%) of monkeys |         | P value <sup>a</sup> |
|--------------------|-------------------|---------|----------------------|---------------------|-------------------|---------|----------------------|
|                    | Ab high           | Ab low  |                      |                     | Ab high           | Ab low  |                      |
| M1                 | 8 (16)            | 42 (84) | 0.6022               | M1                  | 8 (14)            | 50 (86) | 0.1446               |
| Non-M1             | 9 (20)            | 35 (80) |                      | Non-M1              | 13 (26)           | 37 (74) |                      |
| M2                 | 7 (29)            | 17 (71) | 0.1319               | M2                  | 10 (30)           | 23 (70) | 0.0691               |
| Non-M2             | 11 (15)           | 64 (85) |                      | Non-M2              | 11 (15)           | 64 (85) |                      |
| M3                 | 6 (16)            | 32 (84) | 0.7919               | M3                  | 9 (23)            | 30 (77) | 0.4429               |
| Non-M3             | 11 (18)           | 49 (82) |                      | Non-M3              | 11 (16)           | 57 (84) |                      |
| M4                 | 4 (13)            | 26 (87) | 0.5703               | M4                  | 6 (17)            | 29 (83) | 0.7965               |
| Non-M4             | 13 (20)           | 53 (80) |                      | Non-M4              | 15 (21)           | 55 (79) |                      |
| M5                 | 1 (13)            | 7 (87)  | 1.0000               | M5                  | 2 (17)            | 10 (83) | 1.0000               |
| Non-M5             | 19 (20)           | 76 (80) |                      | Non-M5              | 19 (20)           | 77 (80) |                      |
| M6                 | 4 (29)            | 10 (71) | 0.4637               | M6                  | 3 (27)            | 8 (73)  | 0.4430               |
| Non-M6             | 16 (18)           | 74 (82) |                      | Non-M6              | 17 (18)           | 75 (82) |                      |
| M7                 | 1 (25)            | 3 (75)  | 1.0000               | M7                  | 1 (33)            | 2 (67)  | 0.4954               |
| Non-M7             | 20 (19)           | 84 (81) |                      | Non-M7              | 20 (20)           | 81 (80) |                      |

a. Fisher's exact test (uncorrected p value).

Recombinant haplotypes for MHC I or MHC II were excluded from analysis.

Ab high,  $\geq 2$  ng/ml; Ab low,  $< 2$  ng/ml.



**Table B panel m.** Univariate analysis of the effects of MHC haplotypes on natural antibodies to SIVgag.

| MHC I<br>haplotype | No.(%) of monkeys |         | P value <sup>a</sup> | MHC II<br>haplotype | No.(%) of monkeys |         | P value <sup>a</sup> |
|--------------------|-------------------|---------|----------------------|---------------------|-------------------|---------|----------------------|
|                    | Ab high           | Ab low  |                      |                     | Ab high           | Ab low  |                      |
| M1                 | 6 (12)            | 44 (88) | 0.1828               | M1                  | 7 (12)            | 51 (88) | 0.0829               |
| Non-M1             | 10 (23)           | 34 (77) |                      | Non-M1              | 13 (26)           | 37 (74) |                      |
| M2                 | 6 (25)            | 18 (75) | 0.3495               | M2                  | 9 (27)            | 24 (73) | 0.1771               |
| Non-M2             | 11 (15)           | 64 (85) |                      | Non-M2              | 11 (15)           | 64 (85) |                      |
| M3                 | 5 (13)            | 33 (87) | 0.4228               | M3                  | 7 (18)            | 32 (82) | 1.0000               |
| Non-M3             | 13 (22)           | 47 (78) |                      | Non-M3              | 13 (19)           | 55 (81) |                      |
| M4                 | 7 (23)            | 23 (77) | 0.5732               | M4                  | 8 (23)            | 27 (77) | 0.5989               |
| Non-M4             | 11 (17)           | 55 (83) |                      | Non-M4              | 12 (17)           | 58 (83) |                      |
| M5                 | 3 (38)            | 5 (62)  | 0.1623               | M5                  | 4 (33)            | 8 (67)  | 0.2294               |
| Non-M5             | 16 (17)           | 79 (83) |                      | Non-M5              | 16 (17)           | 80 (83) |                      |
| M6                 | 3 (21)            | 11 (79) | 0.7171               | M6                  | 2 (18)            | 9 (82)  | 1.0000               |
| Non-M6             | 16 (18)           | 74 (82) |                      | Non-M6              | 17 (18)           | 75 (82) |                      |
| M7                 | 0 (0)             | 4 (100) | 1.0000               | M7                  | 0 (0)             | 3 (100) | 1.0000               |
| Non-M7             | 20 (19)           | 84 (81) |                      | Non-M7              | 20 (20)           | 81 (80) |                      |

a. Fisher's exact test (uncorrected p value).

Recombinant haplotypes for MHC I or MHC II were excluded from analysis.

Ab high,  $\geq 2$  ng/ml; Ab low,  $< 2$  ng/ml.

**Table B panel n.** Univariate analysis of the effects of MHC haplotypes on natural antibodies to SIVenv1.

| MHC I<br>haplotype | No.(%) of monkeys |         | P value <sup>a</sup> | MHC II<br>haplotype | No.(%) of monkeys |         | P value <sup>a</sup> |
|--------------------|-------------------|---------|----------------------|---------------------|-------------------|---------|----------------------|
|                    | Ab high           | Ab low  |                      |                     | Ab high           | Ab low  |                      |
| M1                 | 18 (36)           | 32 (64) | 1.0000               | M1                  | 18 (31)           | 40 (69) | 0.3153               |
| Non-M1             | 15 (34)           | 29 (66) |                      | Non-M1              | 21 (42)           | 29 (58) |                      |
| M2                 | 8 (33)            | 16 (67) | 0.3579               | M2                  | 13 (39)           | 20 (61) | 0.6679               |
| Non-M2             | 28 (37)           | 47 (63) |                      | Non-M2              | 26 (35)           | 49 (65) |                      |
| M3                 | 16 (42)           | 22 (58) | 0.3982               | M3                  | 15 (38)           | 24 (62) | 0.6776               |
| Non-M3             | 20 (33)           | 40 (67) |                      | Non-M3              | 23 (34)           | 45 (66) |                      |
| M4                 | 8 (27)            | 22 (73) | 0.2529               | M4                  | 12 (34)           | 23 (66) | 0.8306               |
| Non-M4             | 27 (41)           | 39 (59) |                      | Non-M4              | 27 (39)           | 43 (61) |                      |
| M5                 | 4 (50)            | 4 (50)  | 0.4534               | M5                  | 6 (50)            | 6 (50)  | 0.3449               |
| Non-M5             | 33 (35)           | 62 (65) |                      | Non-M5              | 33 (34)           | 63 (66) |                      |
| M6                 | 7 (50)            | 7 (50)  | 0.3711               | M6                  | 5 (45)            | 6 (55)  | 0.5289               |
| Non-M6             | 31 (34)           | 59 (66) |                      | Non-M6              | 33 (36)           | 59 (64) |                      |
| M7                 | 0 (0)             | 4 (100) | 0.2943               | M7                  | 0 (0)             | 3 (100) | 0.2900               |
| Non-M7             | 39 (38)           | 65 (62) |                      | Non-M7              | 39 (39)           | 62 (61) |                      |

a. Fisher's exact test (uncorrected p value).

Recombinant haplotypes for MHC I or MHC II were excluded from analysis.

Ab high,  $\geq 2$  ng/ml; Ab low,  $< 2$  ng/ml.

**Table B panel o.** Univariate analysis of the effects of MHC haplotypes on natural antibodies to SIVenv2.

| MHC I<br>haplotype | No.(%) of monkeys |         | P value <sup>a</sup> | MHC II<br>haplotype | No.(%) of monkeys |         | P value <sup>a</sup> |
|--------------------|-------------------|---------|----------------------|---------------------|-------------------|---------|----------------------|
|                    | Ab high           | Ab low  |                      |                     | Ab high           | Ab low  |                      |
| M1                 | 20 (40)           | 30 (60) | 0.5109               | M1                  | 25 (43)           | 33 (57) | 1.0000               |
| Non-M1             | 18 (41)           | 26 (59) |                      | Non-M1              | 21 (42)           | 29 (58) |                      |
| M2                 | 11 (46)           | 13 (54) | 0.8164               | M2                  | 15 (45)           | 18 (55) | 0.8350               |
| Non-M2             | 32 (43)           | 43 (57) |                      | Non-M2              | 32 (43)           | 43 (57) |                      |
| M3                 | 16 (42)           | 22 (58) | 1.0000               | M3                  | 13 (33)           | 26 (67) | 0.2291               |
| Non-M3             | 25 (42)           | 35 (58) |                      | Non-M3              | 31 (46)           | 37 (54) |                      |
| M4                 | 12 (40)           | 18 (60) | 0.8249               | M4                  | 14 (40)           | 21 (60) | 0.5369               |
| Non-M4             | 29 (44)           | 37 (56) |                      | Non-M4              | 33 (47)           | 37 (53) |                      |
| M5                 | 3 (38)            | 5 (62)  | 1.0000               | M5                  | 5 (42)            | 7 (58)  | 1.0000               |
| Non-M5             | 42 (44)           | 53 (56) |                      | Non-M5              | 42 (44)           | 54 (56) |                      |
| M6                 | 7 (50)            | 7 (50)  | 0.7742               | M6                  | 6 (55)            | 5 (45)  | 0.5343               |
| Non-M6             | 39 (43)           | 51 (57) |                      | Non-M6              | 40 (43)           | 52 (57) |                      |
| M7                 | 1 (25)            | 3 (75)  | 0.6274               | M7                  | 1 (33)            | 2 (67)  | 1.0000               |
| Non-M7             | 47 (45)           | 57 (55) |                      | Non-M7              | 46 (46)           | 55 (54) |                      |

a. Fisher's exact test (uncorrected p value).

Recombinant haplotypes for MHC I or MHC II were excluded from analysis.

Ab high,  $\geq 2$  ng/ml; Ab low,  $< 2$  ng/ml.
